# Supplementary material
Source: ML conference proceedings conference paper supplement (https://openaccess.thecvf.com/content/CVPR2021/html/Zheng_SE-SSD_Self-Ensembling_Single-Stage_CVPR_2021_paper.html)
Supplement: Supplementary file 1 [file Zheng_SE-SSD_Self-Ensembling_Single-Stage_CVPR_2021_supplemental.pdf]

This supplementary material contains the following three sections. Section A shows screenshots of the KITTI 3D and BEV leaderboard taken on the date of CVPR submission, showing the rank and time performance of our SE-SSD. Section B presents further ablation studies to analyze our ODIOU loss and shape-aware data augmentation on KITTI car dataset. Section C shows the 3D and BEV detection results of our baseline SSD and SE-SSD on the KITTI cyclist and pedestrian benchmarks. All our results on the KITTI *val* split are averaged from multiple runs and evaluated with the average precision of 40 sampling recall points.

## A. KITTI Car Detection Leaderboards

As shown in Figures 1 and 2, our SE-SSD ranks 1st and 2nd on the KITTI BEV and 3D leaderboards of car detection<sup>1</sup>, respectively, comparing with not only prior published works but also unpublished works submitted to the leaderboard. Also, our SE-SSD runs the fastest among the top submissions and achieved a balanced performance for the three difficulty levels, especially in 3D detection.

|                                                                                                                      | Method             | Setting | Code | Moderate | Easy    | Hard    | Runtime |
|----------------------------------------------------------------------------------------------------------------------|--------------------|---------|------|----------|---------|---------|---------|
| 1                                                                                                                    | SE-SSD             |         |      | 91.84 %  | 95.68 % | 86.72 % | 0.03 s  |
| 2                                                                                                                    | ADLAB              |         |      | 91.66 %  | 95.56 % | 86.92 % | 0.05 s  |
| 3                                                                                                                    | SPANet             |         |      | 91.59 %  | 95.59 % | 86.53 % | 0.06 s  |
| 4                                                                                                                    | PVGNet             |         |      | 91.26 %  | 94.36 % | 86.63 % | 0.05 s  |
| 5                                                                                                                    | SA-SSD             |         | code | 91.03 %  | 95.03 % | 85.96 % | 0.04 s  |
| C. He, H. Zeng, J. Huang, X. Hua and L. Zhang: <a href="#">Structure Aware Single-stage 3D Object Detection fr</a>   |                    |         |      |          |         |         |         |
| 6                                                                                                                    | MMLab-PV-RCNN      |         | code | 90.65 %  | 94.98 % | 86.14 % | 0.08 s  |
| S. Shi, C. Guo, L. Jiang, Z. Wang, J. Shi, X. Wang and H. Li: <a href="#">PV-RCNN: Point-Voxel Feature Set Abstr</a> |                    |         |      |          |         |         |         |
| 7                                                                                                                    | CN                 |         |      | 90.50 %  | 94.51 % | 85.86 % | 0.04 s  |
| 8                                                                                                                    | Anonymous          |         | code | 90.46 %  | 92.83 % | 85.94 % | 0.05 s  |
| 9                                                                                                                    | DSA-PV-RCNN        |         | code | 90.13 %  | 92.42 % | 85.93 % | 0.08 s  |
| 10                                                                                                                   | Associate-3Ddet_v2 |         |      | 90.00 %  | 95.55 % | 84.72 % | 0.04 s  |

Figure 1. KITTI BEV (Bird’s Eye View) car detection leaderboard, in which our SE-SSD ranks the 1st place.

|    | Method         | Setting | Code | Moderate | Easy    | Hard    | Runtime |
|----|----------------|---------|------|----------|---------|---------|---------|
| 1  | HRI-ADLab-HZ   |         |      | 82.83 %  | 89.00 % | 76.00 % | 0.1 s   |
| 2  | SE-SSD         |         |      | 82.54 %  | 91.49 % | 77.15 % | 0.03 s  |
| 3  | BorderAtt      |         |      | 82.33 %  | 87.77 % | 77.37 % | 0.08 s  |
| 4  | HUAWEI Octopus |         |      | 82.13 %  | 88.26 % | 77.41 % | 0.1 s   |
| 5  | ADLAB          |         |      | 82.08 %  | 90.92 % | 77.36 % | 0.05 s  |
| 6  | PV-RCNN-v2     |         |      | 81.88 %  | 90.14 % | 77.15 % | 0.06 s  |
| 7  | RangerCNN-LV   |         |      | 81.85 %  | 88.76 % | 77.18 % | 0.1 s   |
| 8  | PVGNet         |         |      | 81.81 %  | 89.94 % | 77.09 % | 0.05 s  |
| 9  | Anonymous      |         | code | 81.63 %  | 90.26 % | 76.88 % | 0.05 s  |
| 10 | Voxel R-CNN    |         |      | 81.62 %  | 90.90 % | 77.06 % | 0.04 s  |

Figure 2. KITTI 3D car detection leaderboard, in which our SE-SSD ranks the 2nd place (HRI-ADLab-HZ is unpublished).

## B. More Ablation Studies

**Shape-aware data augmentation** We analyze the effect of random dropout, swap, and sparsifying in our shape-aware

| Type        | baseline | dropout | swap  | sparsify | Full SA-DA   |
|-------------|----------|---------|-------|----------|--------------|
| Moderate AP | 83.22    | 83.46   | 83.48 | 83.43    | <b>83.70</b> |

Table 1. Ablation study on the operators (random dropout, swap, and sparsifying) in our shape-aware data augmentation (SA-DA).

| $\gamma$    | 0.25  | 0.5   | 0.75  | 1.0   | 1.25         | 1.5   | 1.75  |
|-------------|-------|-------|-------|-------|--------------|-------|-------|
| Moderate AP | 83.47 | 83.65 | 83.73 | 83.78 | <b>83.85</b> | 83.58 | 83.52 |

Table 2. Ablation study on our ODIOU loss, in which we compare the 3D moderate AP of different settings of  $\gamma$ .

|     | Cyclist    | Easy         | Moderate     | Hard         |
|-----|------------|--------------|--------------|--------------|
| 3D  | SSD        | 75.73        | 55.86        | 51.97        |
|     | our SE-SSD | <b>80.07</b> | <b>70.43</b> | <b>66.45</b> |
| BEV | SSD        | 83.71        | 59.02        | 55.05        |
|     | our SE-SSD | <b>91.83</b> | <b>72.62</b> | <b>68.24</b> |

Table 3. Comparison of 3D and BEV APs between our baseline SSD and SE-SSD on KITTI *val* split for “cyclist” detection.

|     | Pedestrian | Easy         | Moderate     | Hard         |
|-----|------------|--------------|--------------|--------------|
| 3D  | SSD        | 59.64        | 52.63        | 46.59        |
|     | our SE-SSD | <b>63.27</b> | <b>57.32</b> | <b>50.82</b> |
| BEV | SSD        | 63.53        | 57.29        | 51.36        |
|     | our SE-SSD | <b>67.47</b> | <b>61.88</b> | <b>55.94</b> |

Table 4. Comparison of 3D and BEV APs between our baseline SSD and SE-SSD on KITTI *val* split for “pedestrian” detection.

data augmentation on KITTI *val* split for car detection, respectively. As Table 1 shows, all these operators (random dropout, swap, and sparsifying) boost the 3D moderate AP effectively, thus demonstrating the effectiveness of our proposed augmentation operators to enrich the object diversity.

**ODIOU Loss** Next, we try different values of  $\gamma$  in the ODIOU loss on KITTI *val* split for car detection. As Table 2 shows, the orientation constraint is an important factor to further boost the precision, so we finally set  $\gamma$  as 1.25.

## C. Experiments on KITTI Cyclist&Pedestrian

To validate the effectiveness of our SE-SSD framework, we further conduct experiments on the Cyclist and Pedestrian datasets in KITTI benchmark. In Tables 3 and 4, we compare the 3D and BEV average precisions between the baseline SSD and our SE-SSD on KITTI *val* split.

**Cyclist & Pedestrian Results** As Table 3 shows, our SE-SSD outperforms the baseline SSD by a large margin for both 3D and BEV cyclist detection, especially on the 3D moderate and hard subsets with an improvement of about 15 points. As Table 4 shows, our SE-SSD also outperforms the baseline SSD on both the 3D and BEV pedestrian detection by a large margin. These large improvements clearly show the effectiveness of our proposed SE-SSD framework.

<sup>1</sup>On the date of CVPR deadline, i.e., Nov 16, 2020
